# Supplementary material
Source: publisher figshare collection journal article supplement (https://acs.figshare.com/ndownloader/files/12105632)
Supplement: Supplementary file 1 [file 12105632]

## Supplementary Information

### Electrolyte-free dye sensitized solar cell with high open circuit voltage using a bi-functional ferrocene based cyanovinyl molecule as dye and redox couple.

A. Ghosh,<sup>a</sup> S. Mishra, S. Giri,<sup>b</sup> S. M. Mobin,<sup>c</sup> A. Bera,<sup>\*d</sup> S. Chatterjee <sup>\*a</sup>

<sup>a</sup>Department of Chemistry, National Institute of Technology Rourkela, Orissa 769008, India.

<sup>b</sup>Theoretical Chemistry Laboratory, Department of Chemistry, National Institute of Technology Rourkela, Orissa-769008, India.

<sup>c</sup>Discipline of Chemistry, Indian Institute of Technology Indore, Simrol, Madhya Pradesh 452017, India.

<sup>d</sup>Department of Physics, Indian Institute of Technology Jammu, Jammu, Jammu & Kashmir 181121, India.

\*Corresponding author. Tel.: +91 661 2462656; Fax : +91 661 2472926

E-mail address: [saurav@nitrkl.ac.in](mailto:saurav@nitrkl.ac.in), [ashok.bera@iitjammu.ac.in](mailto:ashok.bera@iitjammu.ac.in)

### Contents:

Figure S1: <sup>1</sup>H NMR of Compound 1

Figure S2: <sup>1</sup>H NMR of Compound 2

Figure S3: <sup>1</sup>H NMR of Compound 3

Figure S4: <sup>1</sup>H NMR of Compound 4

Figure S5: <sup>1</sup>H NMR of Compound 5

Figure S6: Molecular Structure of 2

Figure S7: Cyclic voltammograms (—) and differential pulse voltammograms (...)

Figure S8: DFT optimized structure of 1 and 2.

Table S1: Gross electron population on the neutral and oxidised species of compounds 1 and 2.

Figure S9: Correlation of UV-Visible absorption spectra of compounds 1 and 2 using TD-DFT

Table S2 : Calculation of Orbital contribution (%)

Table S3: Excitation energies and oscillator strengths of 1

Table S4: Excitation energies and oscillator strengths of 2

Figure S10: Diode like characteristics of TiO<sub>2</sub>/[1],[2]/Pt in Dark condition

Figure S11: FE SEM Images of FTO/TiO<sub>2</sub> layer deposited with compound (a) 1 and (b) 2

**Figure S12:** Band Gap calculation of (a) 1 and (b) 2 using Tauc's Plot.

**Figure S13:** UV –Visible Spectra of compounds 1 and 2 in Dichloromethane solution

**Figure S14:** Thin film absorption spectra of 1, 2 and ferrocene (Fc).

**Figure S15:** Schematic of the TiO<sub>2</sub>/[1],[2]/Pt meso-heterojunction solar cells.

**Figure S16:** Proposed electron transfer processes.

**Table S5 :** Frontier Molecular orbitals of 1, 1<sup>+</sup>, 2 and 2<sup>+</sup>.

**Table S6:** Geometry optimized coordinates for compound 1

**Table S7:** Geometry optimized coordinates for compound 2

**Text S1:** Experimental Sections

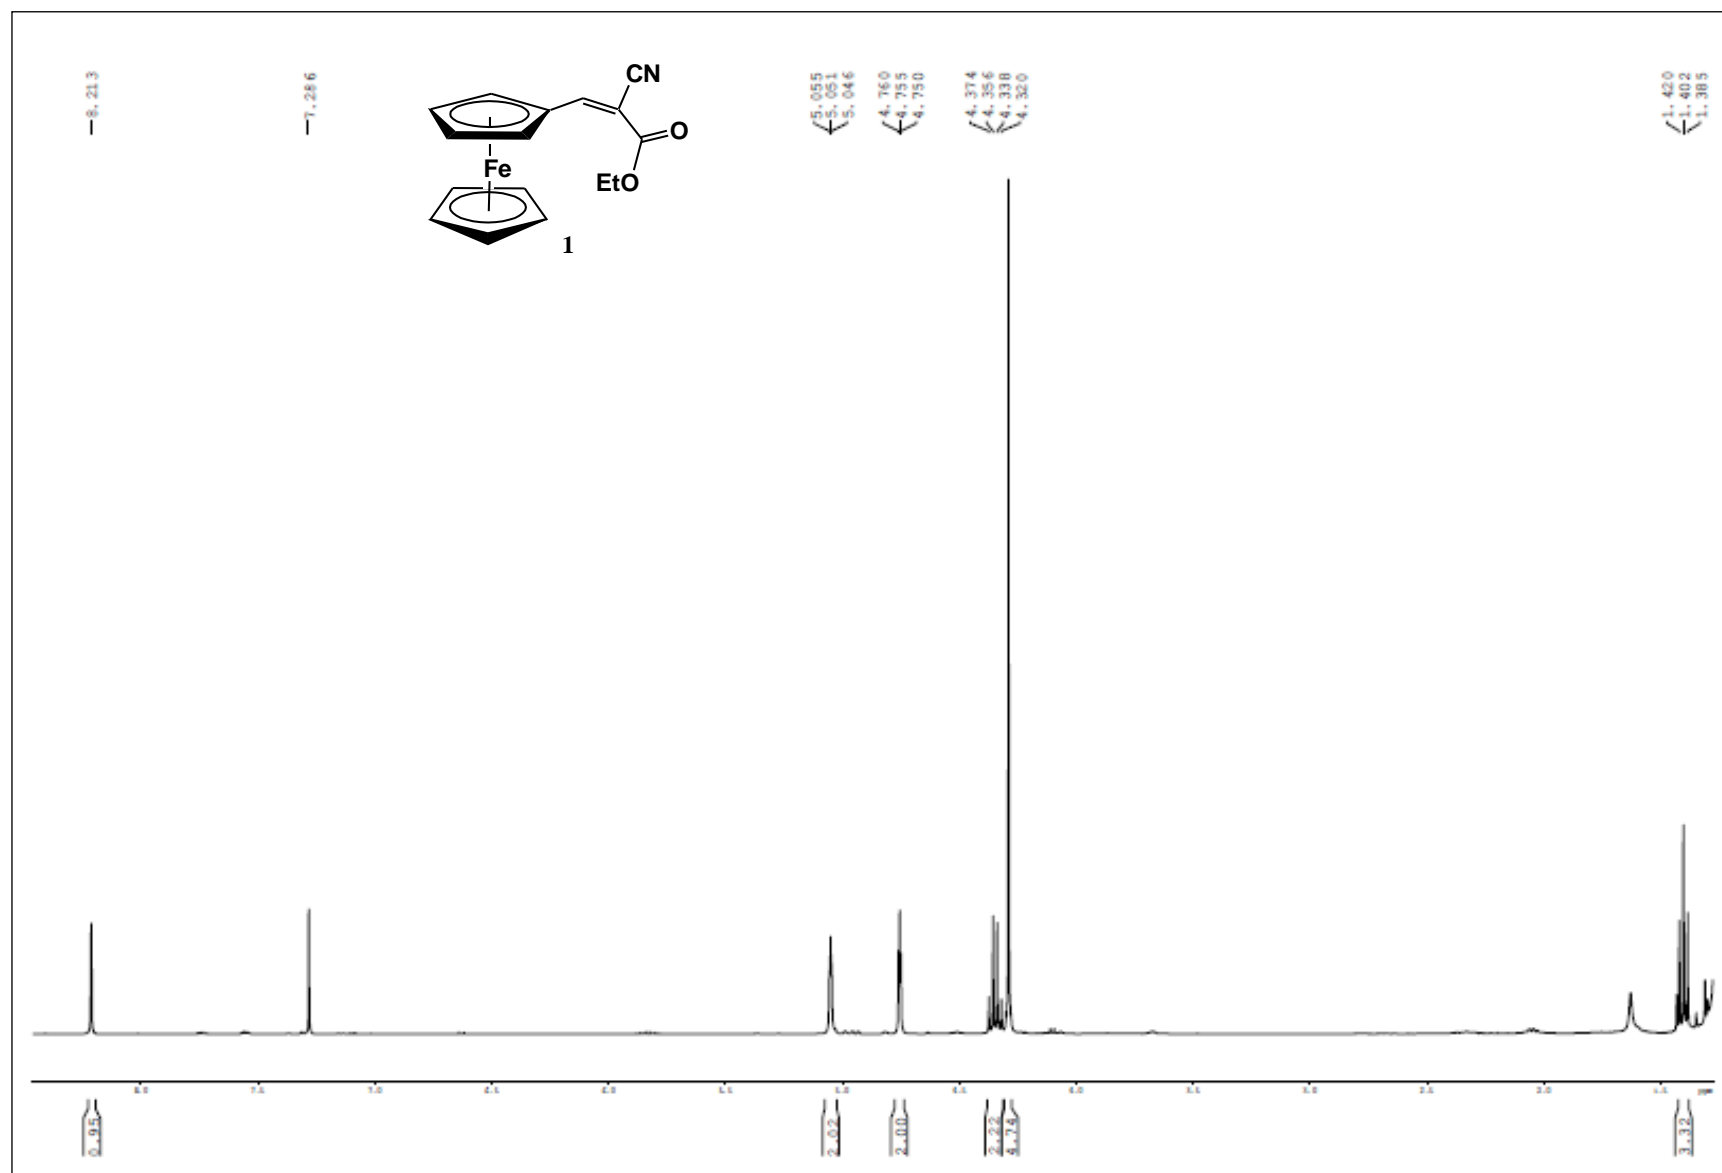

Figure S1: <sup>1</sup>H NMR (CDCl<sub>3</sub>, 400 MHz) of Compound 1

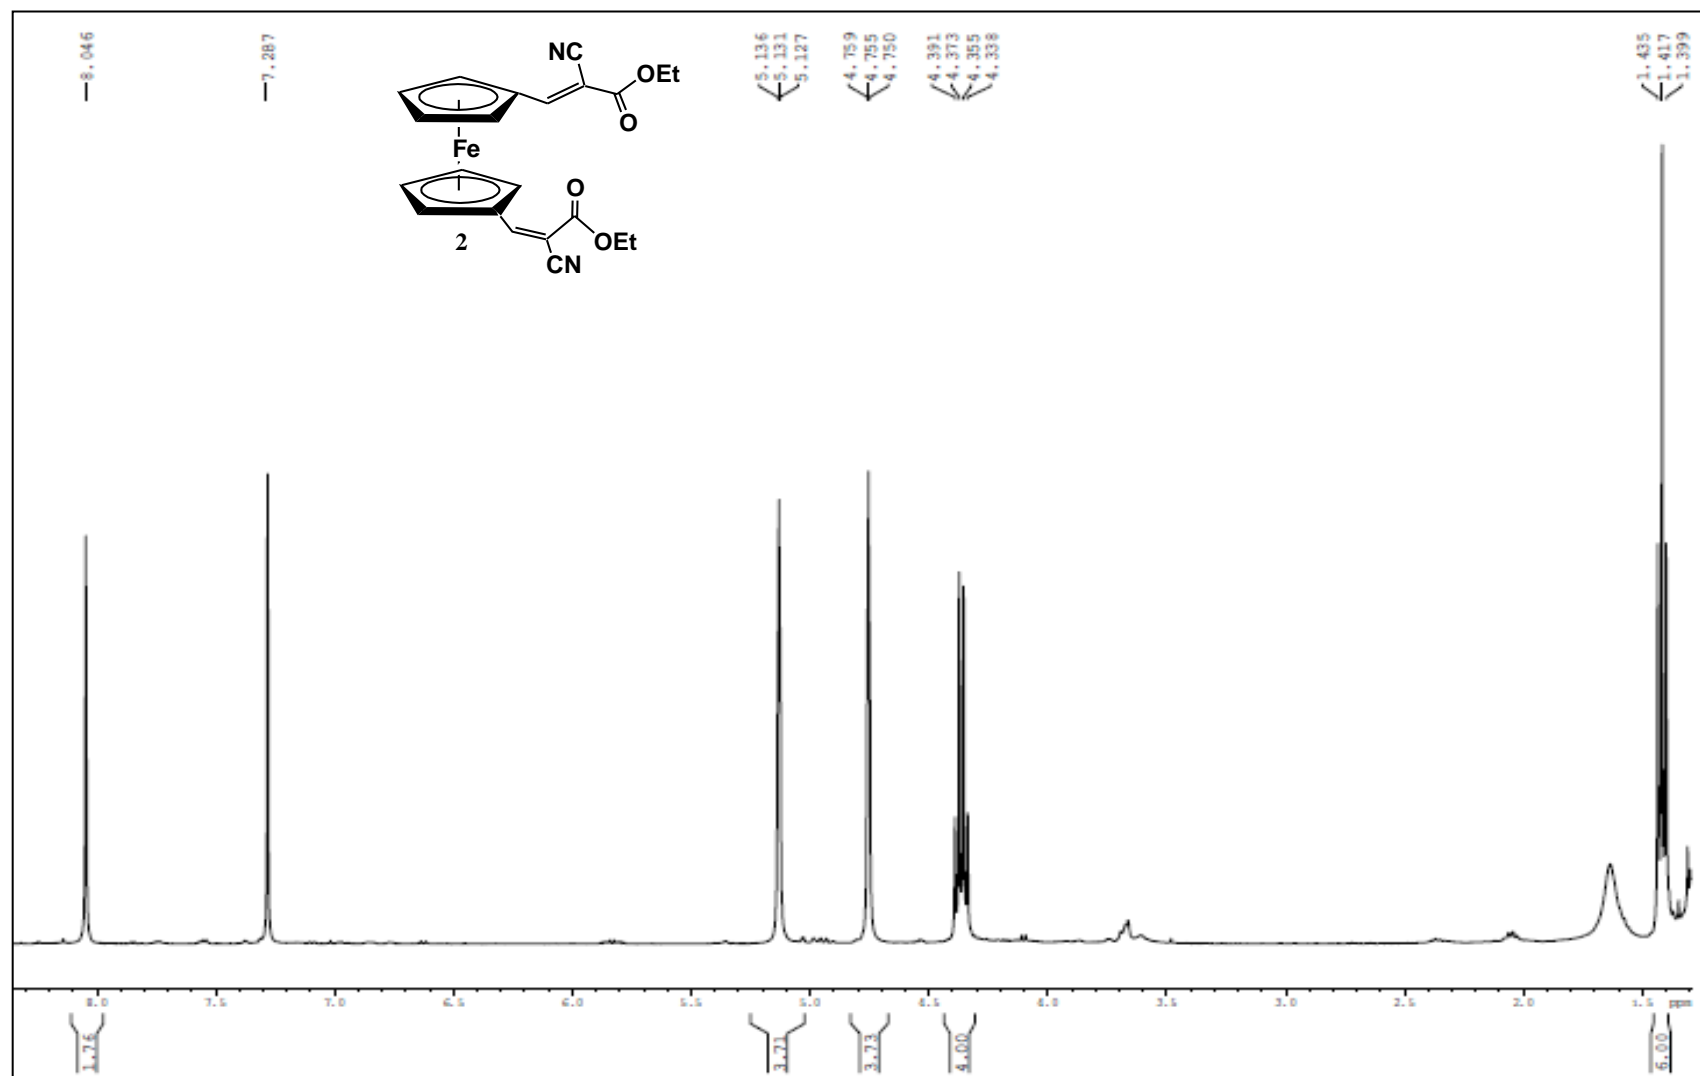

Figure S2:  $^1\text{H}$  NMR ( $\text{CDCl}_3$ , 400 MHz) of Compound 2

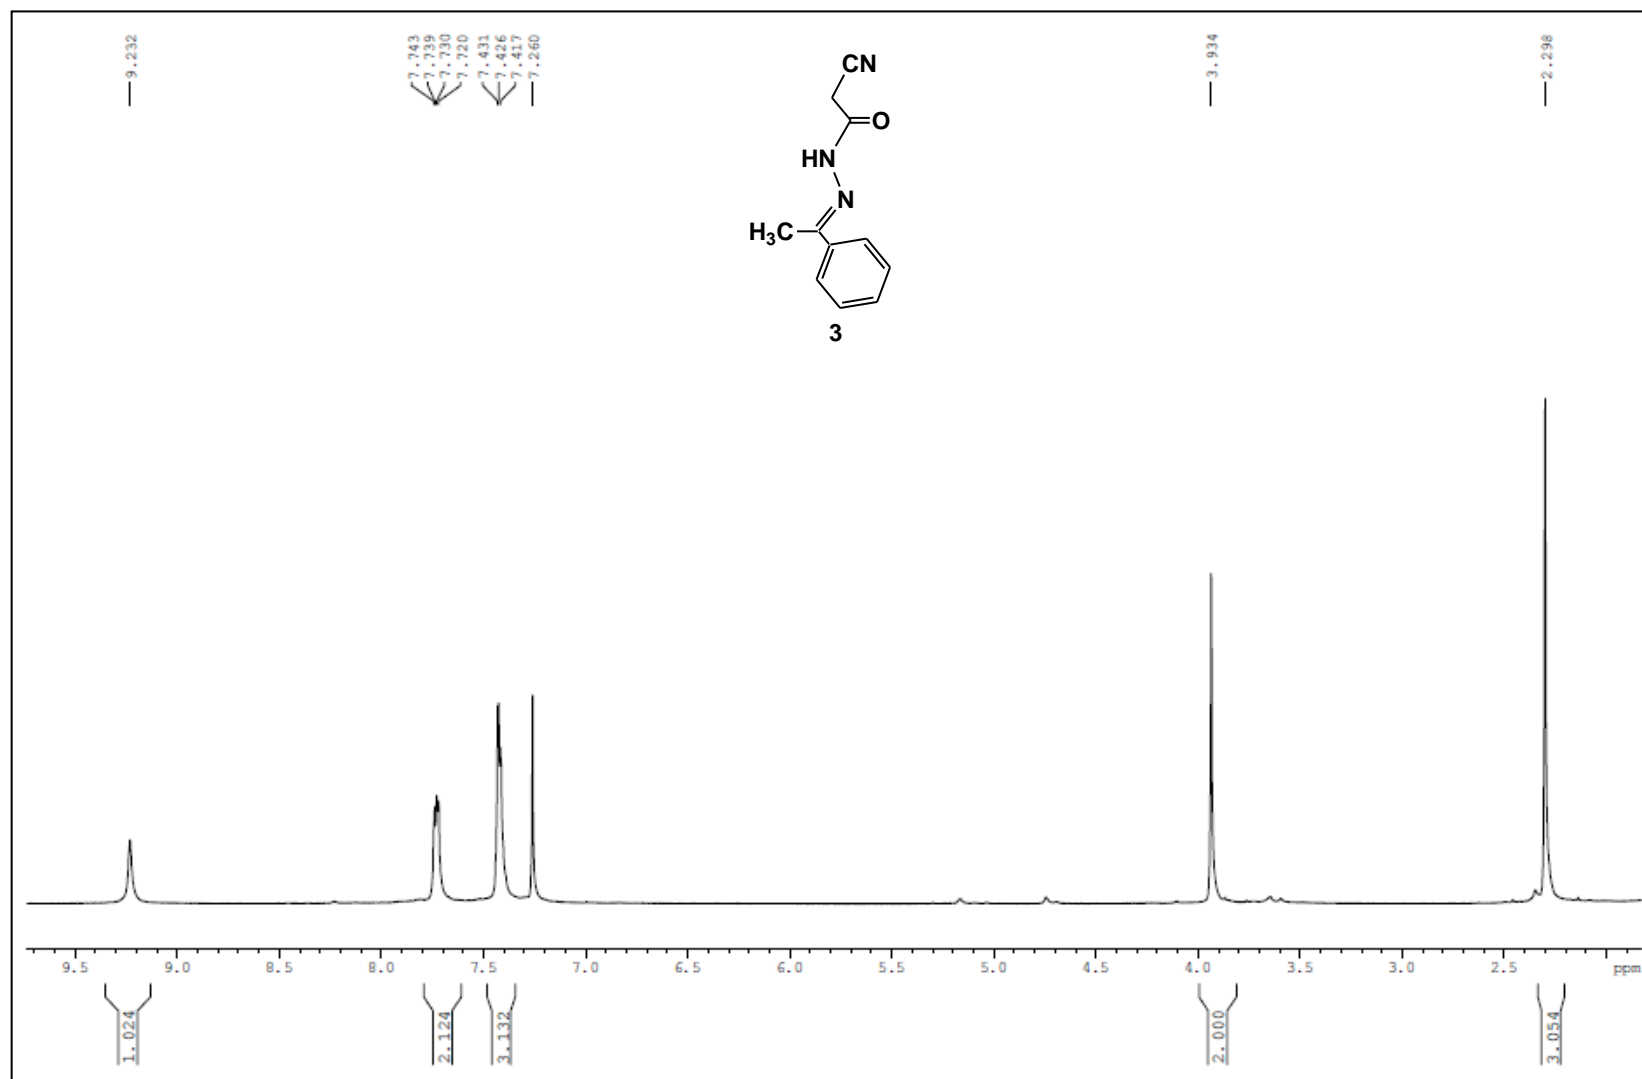

Figure S3: <sup>1</sup>H NMR (CDCl<sub>3</sub>, 400 MHz) of Compound 3

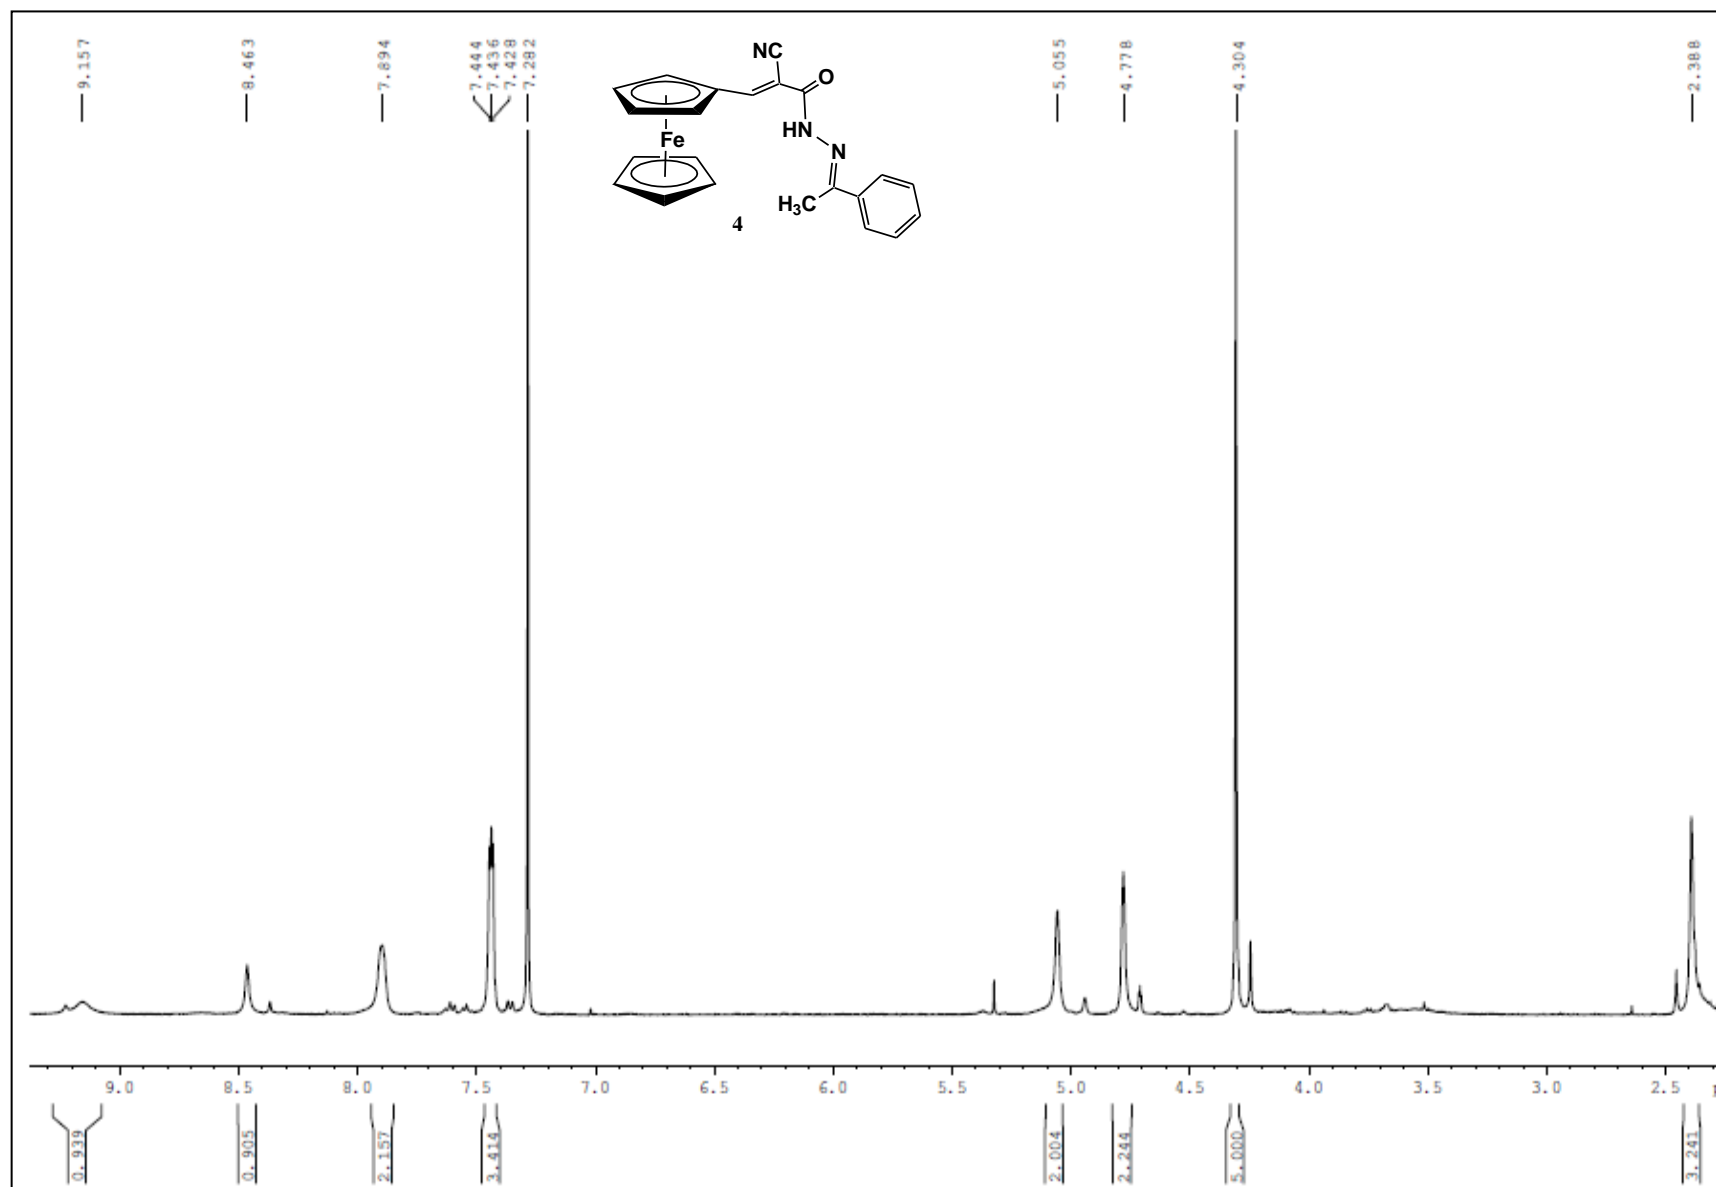

Figure S4: <sup>1</sup>H NMR (CDCl<sub>3</sub>, 400 MHz) of Compound 4

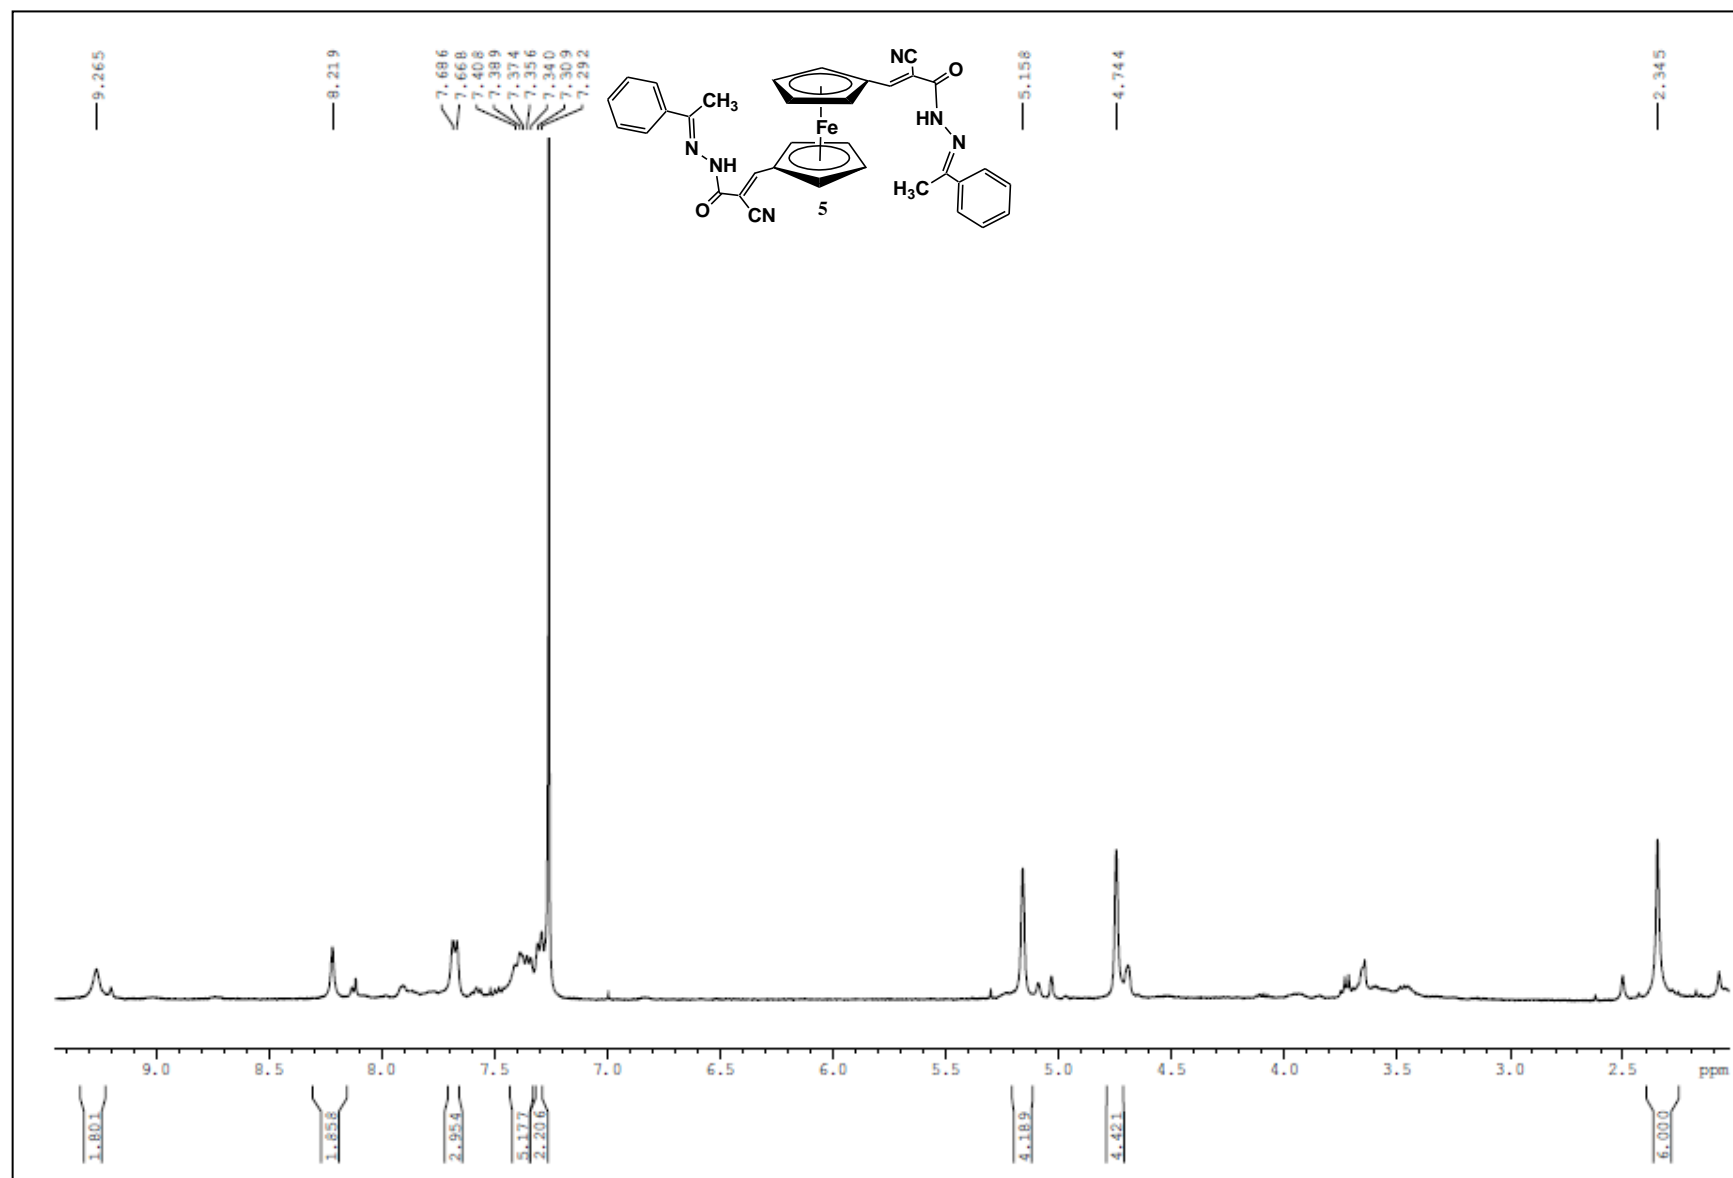

Figure S5: <sup>1</sup>H NMR (CDCl<sub>3</sub>, 400 MHz) of Compound 5

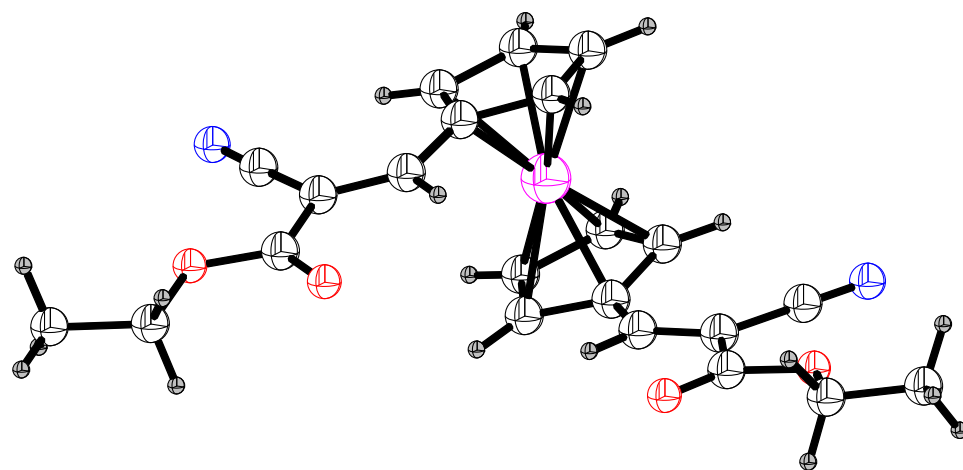

**Figure S6: Molecular Structure of 2**



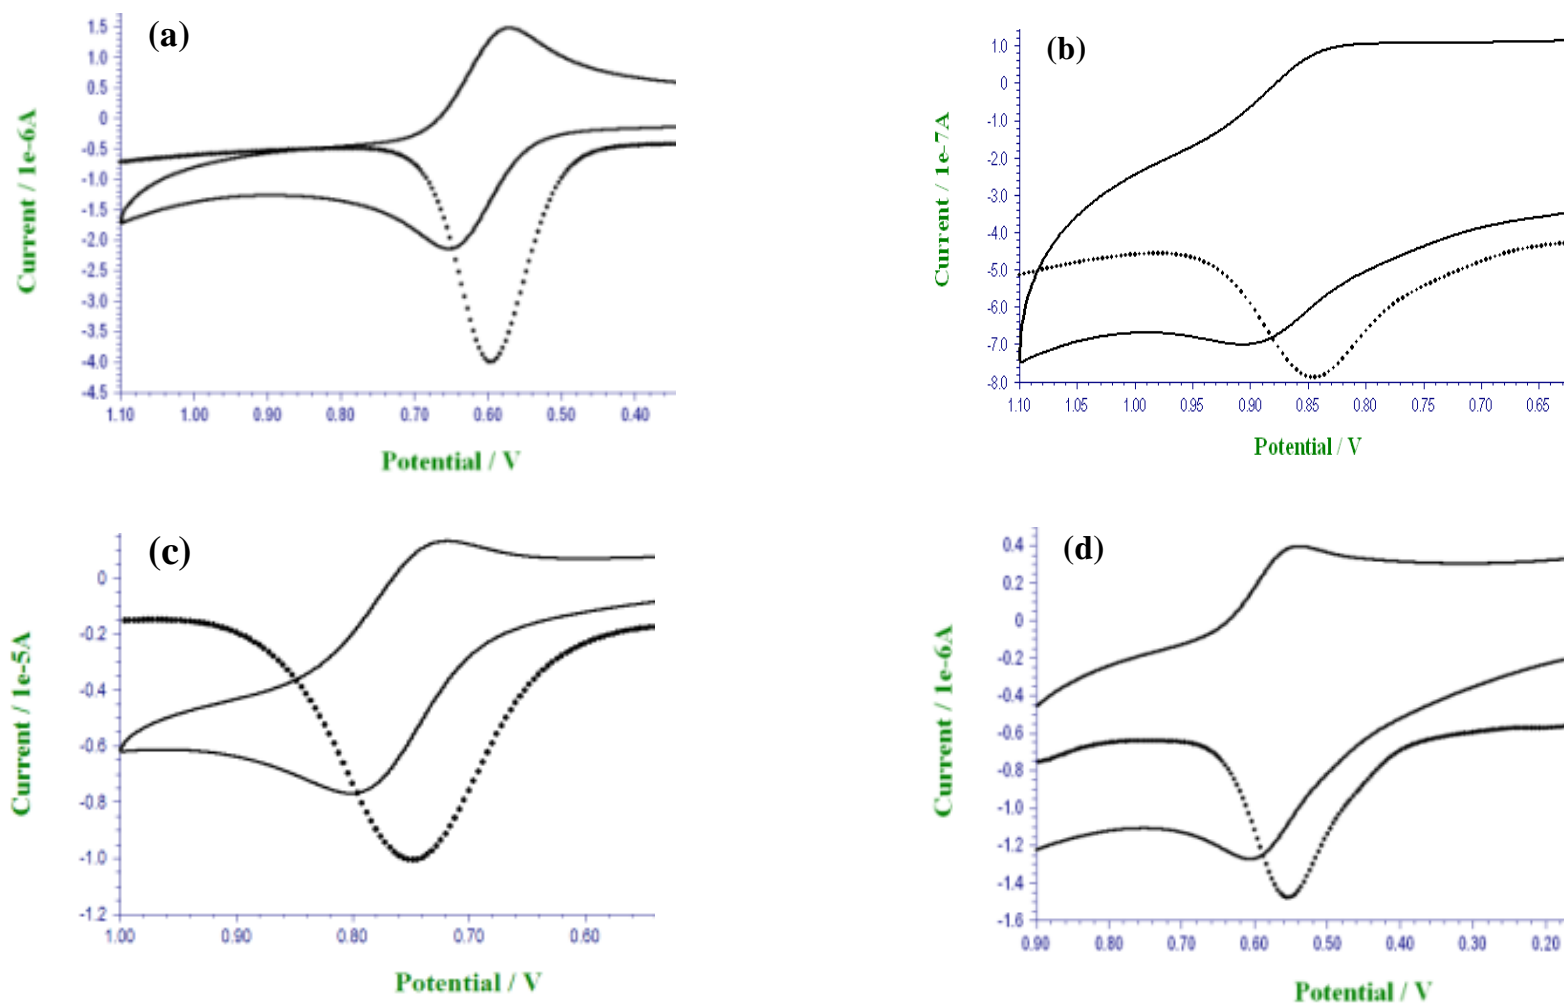

**Figure S7:** Cyclic voltammograms (—) and differential pulse voltammograms (...) of compounds (a)1, (b)2, (c)4, (d)5 in Acetonitrile / 0.1 M TBAP at 298 K vs SCE. Under the same conditions, the potential of the Ferrocenium/Ferrocene couple was 0.37 V versus SCE.

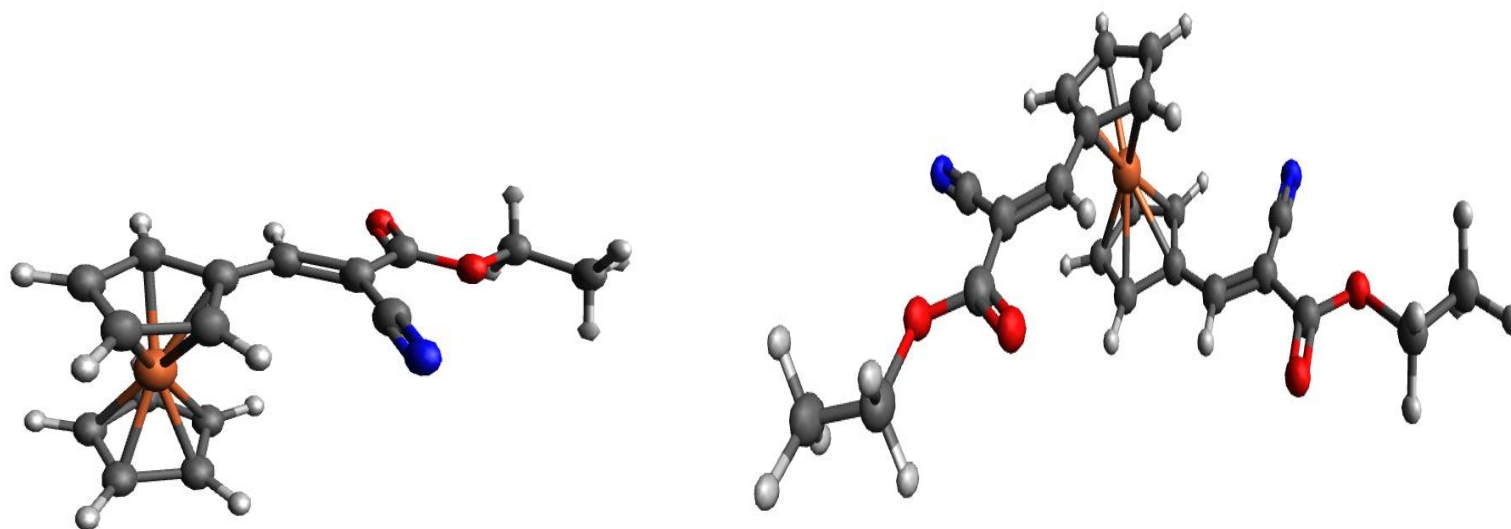

**Figure S8: DFT optimized structure of 1 and 2.**

**Table S1: Gross electron population on the neutral and oxidised species of compounds 1 and 2.**

| Neutral ( <b>1</b> ) |                                                             | Oxidised ( <b>1</b> <sup>+</sup> ) |          |                                                             |
|----------------------|-------------------------------------------------------------|------------------------------------|----------|-------------------------------------------------------------|
| Fe                   | CHC(CN)CO <sub>2</sub> Et                                   | Spin                               | Fe       | CHC(CN)CO <sub>2</sub> Et                                   |
| 26.17438             | 64.32577                                                    | α                                  | 13.61445 | 32.46797                                                    |
|                      |                                                             | β                                  | 12.35951 | 32.48862                                                    |
|                      |                                                             | α-β                                | 1.25494  | -0.02065                                                    |
| Neutral ( <b>2</b> ) |                                                             | Oxidised ( <b>2</b> <sup>+</sup> ) |          |                                                             |
| Fe                   | {CHC(CN)CO <sub>2</sub> Et}/<br>{CHC(CN)CO <sub>2</sub> Et} | Spin                               | Fe       | {CHC(CN)CO <sub>2</sub> Et}/<br>{CHC(CN)CO <sub>2</sub> Et} |
| 26.13880             | 65.094/<br>64.32209                                         | α                                  | 13.618   | 33.1206/<br>32.4623                                         |
|                      |                                                             | β                                  | 12.3221  | 32.48775/<br>32.48774                                       |
|                      |                                                             | α-β                                | 1.29594  | 0.63285/<br>-0.02546                                        |

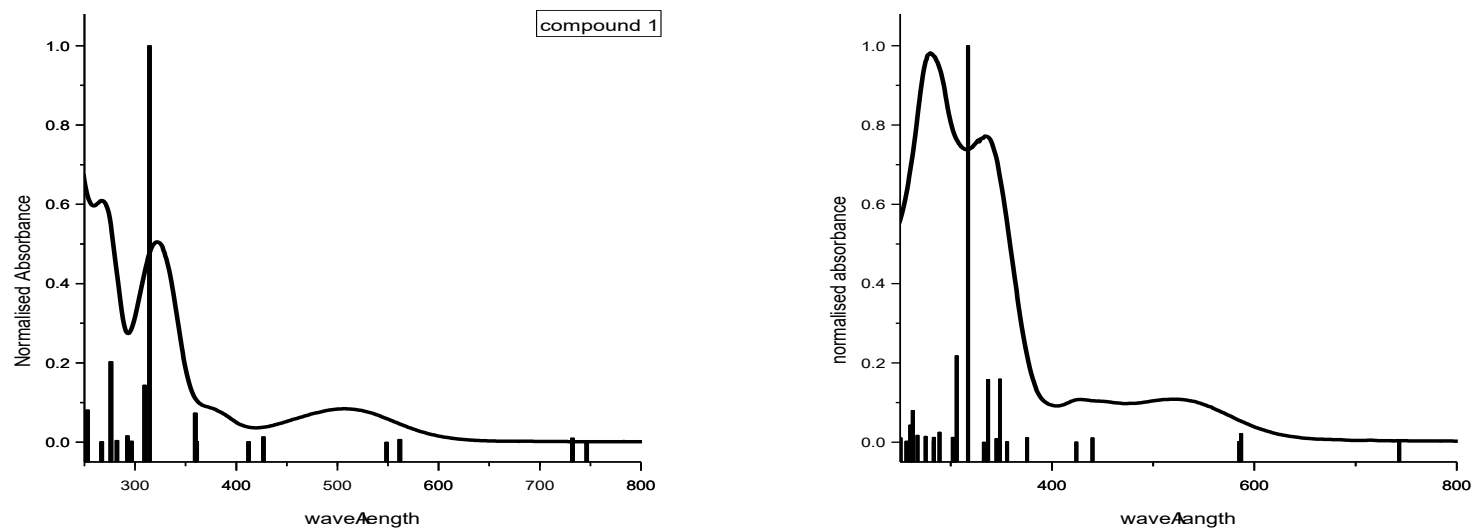

**Figure S9: Correlation of UV-Visible absorption spectra of compounds 1 and 2 using TD-DFT**

**Table S2 : Calculation of Orbital contribution (%)**

| MO's     | CH | Ferrocene | CHCN | Ester |
|----------|----|-----------|------|-------|
| HOMO (1) | 0  | 93        | 1    | 3     |
| LUMO (1) | 34 | 28        | 21   | 17    |
| HOMO (2) | 0  | 87        | 11   | 2     |
| LUMO (2) | 32 | 31        | 22   | 15    |

**Table S3: Excitation energies and oscillator strengths of 1**

(75= HOMO: 76 = LUMO)

|               |    |           |           |           |          |              |
|---------------|----|-----------|-----------|-----------|----------|--------------|
| Excited State | 1: | Singlet-A | 1.6610 eV | 746.42 nm | f=0.0001 | <S**2>=0.000 |
| 74 -> 76      |    | 0.43641   |           |           |          |              |
| 75 -> 77      |    | 0.35912   |           |           |          |              |
| Excited State | 2: | Singlet-A | 1.6932 eV | 732.26 nm | f=0.0046 | <S**2>=0.000 |
| 74 -> 77      |    | 0.38435   |           |           |          |              |
| 75 -> 78      |    | 0.42484   |           |           |          |              |
| Excited State | 3: | Singlet-A | 2.2074 eV | 561.67 nm | f=0.0030 | <S**2>=0.000 |
| 71 -> 78      |    | 0.33564   |           |           |          |              |
| 74 -> 77      |    | 0.45881   |           |           |          |              |
| 75 -> 76      |    | 0.21723   |           |           |          |              |
| Excited State | 4: | Singlet-A | 2.2603 eV | 548.52 nm | f=0.0001 | <S**2>=0.000 |
| 71 -> 77      |    | 0.33804   |           |           |          |              |
| 74 -> 78      |    | 0.14183   |           |           |          |              |
| 75 -> 77      |    | 0.51133   |           |           |          |              |
| Excited State | 5: | Singlet-A | 2.9045 eV | 426.87 nm | f=0.0059 | <S**2>=0.000 |
| 71 -> 76      |    | 0.33174   |           |           |          |              |
| 74 -> 77      |    | 0.31816   |           |           |          |              |
| 75 -> 76      |    | 0.37716   |           |           |          |              |
| Excited State | 6: | Singlet-A | 3.0084 eV | 412.12 nm | f=0.0004 | <S**2>=0.000 |
| 71 -> 77      |    | 0.39742   |           |           |          |              |
| 72 -> 77      |    | 0.11534   |           |           |          |              |
| 74 -> 76      |    | 0.45283   |           |           |          |              |
| 74 -> 78      |    | 0.29314   |           |           |          |              |
| Excited State | 7: | Singlet-A | 3.4351 eV | 360.94 nm | f=0.0009 | <S**2>=0.000 |

|                   |           |           |           |          |              |  |
|-------------------|-----------|-----------|-----------|----------|--------------|--|
| 74 -> 76          | 0.17161   |           |           |          |              |  |
| 74 -> 78          | 0.46383   |           |           |          |              |  |
| 75 -> 77          | 0.27100   |           |           |          |              |  |
| Excited State 8:  | Singlet-A | 3.4485 eV | 359.53 nm | f=0.0327 | <S**2>=0.000 |  |
| 71 -> 78          | 0.11095   |           |           |          |              |  |
| 75 -> 76          | 0.32943   |           |           |          |              |  |
| 75 -> 78          | 0.52350   |           |           |          |              |  |
| Excited State 9:  | Singlet-A | 3.9449 eV | 314.29 nm | f=0.4451 | <S**2>=0.000 |  |
| 70 -> 76          | 0.11371   |           |           |          |              |  |
| 72 -> 76          | 0.24820   |           |           |          |              |  |
| 73 -> 76          | 0.62373   |           |           |          |              |  |
| 75 -> 76          | 0.14891   |           |           |          |              |  |
| Excited State 10: | Singlet-A | 4.0073 eV | 309.40 nm | f=0.0641 | <S**2>=0.000 |  |
| 72 -> 76          | 0.61893   |           |           |          |              |  |
| Excited State 11: | Singlet-A | 4.1819 eV | 296.48 nm | f=0.0012 | <S**2>=0.000 |  |
| 69 -> 76          | 0.68847   |           |           |          |              |  |
| Excited State 12: | Singlet-A | 4.2399 eV | 292.42 nm | f=0.0071 | <S**2>=0.000 |  |
| 71 -> 76          | 0.41323   |           |           |          |              |  |
| 71 -> 78          | 0.40676   |           |           |          |              |  |
| 72 -> 78          | 0.12816   |           |           |          |              |  |
| Excited State 13: | Singlet-A | 4.3949 eV | 282.11 nm | f=0.0020 | <S**2>=0.000 |  |
| 68 -> 76          | 0.65149   |           |           |          |              |  |
| Excited State 14: | Singlet-A | 4.4902 eV | 276.12 nm | f=0.0905 | <S**2>=0.000 |  |
| 68 -> 77          | 0.10564   |           |           |          |              |  |
| 70 -> 76          | 0.58187   |           |           |          |              |  |
| 71 -> 76          | 0.21818   |           |           |          |              |  |
| 71 -> 78          | 0.19291   |           |           |          |              |  |
| Excited State 15: | Singlet-A | 4.6427 eV | 267.05 nm | f=0.0005 | <S**2>=0.000 |  |
| 71 -> 77          | 0.15013   |           |           |          |              |  |
| 73 -> 77          | 0.66916   |           |           |          |              |  |

**Table S4: Excitation energies and oscillator strengths of compound 2**

(107 = HOMO; 108= LUMO)

|               |    |           |           |           |          |              |
|---------------|----|-----------|-----------|-----------|----------|--------------|
| Excited State | 1: | Singlet-A | 1.6109 eV | 769.68 nm | f=0.0004 | <S**2>=0.000 |
| 106 ->108     |    | 0.42113   |           |           |          |              |
| 106 ->111     |    | 0.35255   |           |           |          |              |
| 107 ->110     |    | 0.32160   |           |           |          |              |
| Excited State | 2: | Singlet-A | 1.6686 eV | 743.03 nm | f=0.0014 | <S**2>=0.000 |
| 106 ->109     |    | 0.27193   |           |           |          |              |
| 107 ->108     |    | 0.36627   |           |           |          |              |
| 107 ->111     |    | 0.36171   |           |           |          |              |
| Excited State | 3: | Singlet-A | 2.1125 eV | 586.90 nm | f=0.0160 | <S**2>=0.000 |
| 103 ->108     |    | 0.27340   |           |           |          |              |
| 103 ->111     |    | 0.28682   |           |           |          |              |
| 106 ->108     |    | 0.29666   |           |           |          |              |
| 106 ->111     |    | 0.18587   |           |           |          |              |
| 107 ->109     |    | 0.31882   |           |           |          |              |
| Excited State | 4: | Singlet-A | 2.1190 eV | 585.11 nm | f=0.0010 | <S**2>=0.000 |
| 103 ->110     |    | 0.28638   |           |           |          |              |
| 105 ->110     |    | 0.12064   |           |           |          |              |
| 106 ->109     |    | 0.33333   |           |           |          |              |
| Excited State | 5: | Singlet-A | 2.8170 eV | 440.13 nm | f=0.0078 | <S**2>=0.000 |
| 103 ->108     |    | 0.38780   |           |           |          |              |
| 103 ->111     |    | 0.32735   |           |           |          |              |
| 105 ->108     |    | 0.21430   |           |           |          |              |
| Excited State | 6: | Singlet-A | 2.9243 eV | 423.98 nm | f=0.0003 | <S**2>=0.000 |
| 103 ->110     |    | 0.39252   |           |           |          |              |
| 105 ->110     |    | 0.11398   |           |           |          |              |
| 107 ->108     |    | 0.29701   |           |           |          |              |
| Excited State | 7: | Singlet-A | 3.3036 eV | 375.30 nm | f=0.0083 | <S**2>=0.000 |
| 106 ->111     |    | 0.38047   |           |           |          |              |

|                   |           |           |           |          |              |  |
|-------------------|-----------|-----------|-----------|----------|--------------|--|
| 107 ->109         | 0.37902   |           |           |          |              |  |
| 107 ->110         | 0.29627   |           |           |          |              |  |
| Excited State 8:  | Singlet-A | 3.4860 eV | 355.66 nm | f=0.0005 | <S**2>=0.000 |  |
| 106 ->109         | 0.43911   |           |           |          |              |  |
| 106 ->110         | 0.47214   |           |           |          |              |  |
| 107 ->108         | 0.15916   |           |           |          |              |  |
| Excited State 9:  | Singlet-A | 3.5562 eV | 348.64 nm | f=0.1178 | <S**2>=0.000 |  |
| 103 ->108         | 0.17097   |           |           |          |              |  |
| 106 ->108         | 0.18193   |           |           |          |              |  |
| 107 ->109         | 0.25436   |           |           |          |              |  |
| 107 ->110         | 0.42274   |           |           |          |              |  |
| Excited State 10: | Singlet-A | 3.5929 eV | 345.08 nm | f=0.0064 | <S**2>=0.000 |  |
| 103 ->110         | 0.15668   |           |           |          |              |  |
| 105 ->109         | 0.17182   |           |           |          |              |  |
| 106 ->110         | 0.18048   |           |           |          |              |  |
| 107 ->111         | 0.50344   |           |           |          |              |  |
| Excited State 11: | Singlet-A | 3.6808 eV | 336.84 nm | f=0.1171 | <S**2>=0.000 |  |
| 105 ->108         | 0.56309   |           |           |          |              |  |
| Excited State 12: | Singlet-A | 3.7261 eV | 332.75 nm | f=0.0000 | <S**2>=0.000 |  |
| 104 ->108         | 0.53470   |           |           |          |              |  |
| 106 ->110         | 0.10329   |           |           |          |              |  |
| 107 ->111         | 0.19233   |           |           |          |              |  |
| Excited State 13: | Singlet-A | 3.9112 eV | 317.00 nm | f=0.7413 | <S**2>=0.000 |  |
| 104 ->109         | 0.58469   |           |           |          |              |  |
| 105 ->108         | 0.33096   |           |           |          |              |  |
| 107 ->109         | 0.13900   |           |           |          |              |  |
| Excited State 14: | Singlet-A | 4.0544 eV | 305.80 nm | f=0.1616 | <S**2>=0.000 |  |
| 104 ->108         | 0.36094   |           |           |          |              |  |
| 105 ->109         | 0.47052   |           |           |          |              |  |
| 107 ->108         | 0.15346   |           |           |          |              |  |



|               |     |           |           |           |          |              |
|---------------|-----|-----------|-----------|-----------|----------|--------------|
| Excited State | 15: | Singlet-A | 4.1010 eV | 302.33 nm | f=0.0035 | <S**2>=0.000 |
| 101 ->108     |     | 0.50551   |           |           |          |              |
| Excited State | 16: | Singlet-A | 4.1035 eV | 302.14 nm | f=0.0088 | <S**2>=0.000 |
| 102 ->108     |     | 0.48261   |           |           |          |              |
| 105 ->109     |     | 0.10845   |           |           |          |              |
| Excited State | 17: | Singlet-A | 4.2913 eV | 288.92 nm | f=0.0183 | <S**2>=0.000 |
| 99 ->108      |     | 0.53808   |           |           |          |              |
| 99 ->111      |     | 0.17918   |           |           |          |              |
| 103 ->108     |     | 0.20847   |           |           |          |              |

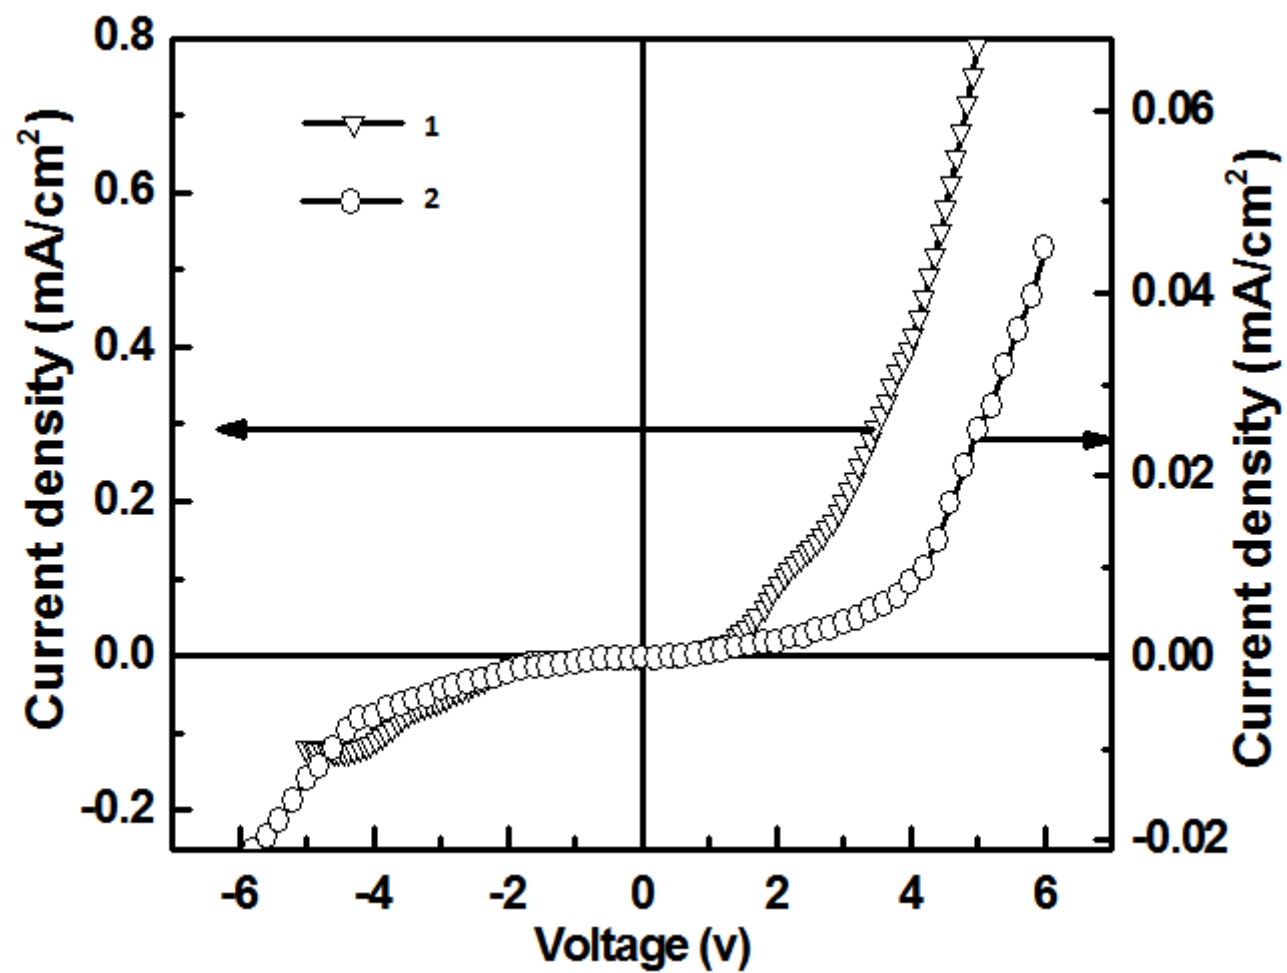

Figure S10: Diode like characteristics of TiO<sub>2</sub>/[1],[2]/Pt in Dark condition

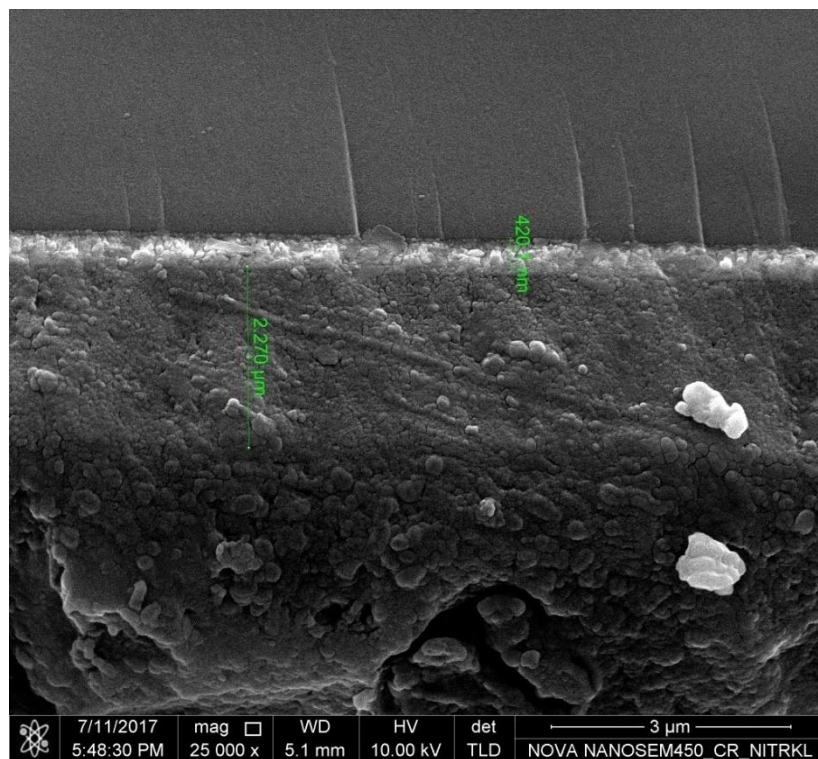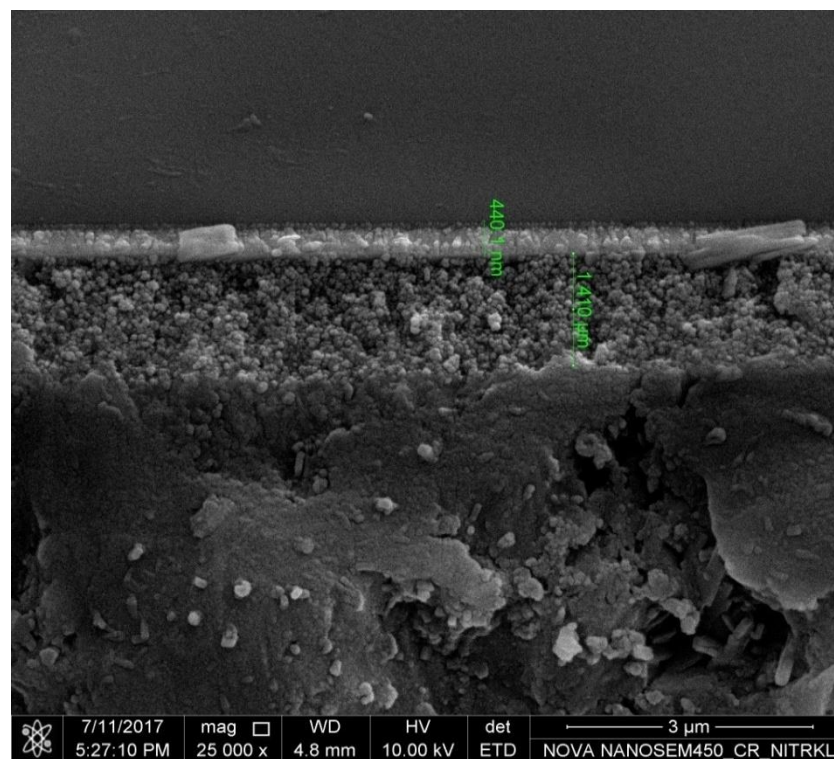

**Figure S11: FE SEM Images of FTO/TiO<sub>2</sub> layer deposited with compound (a) 1 and (b) 2**

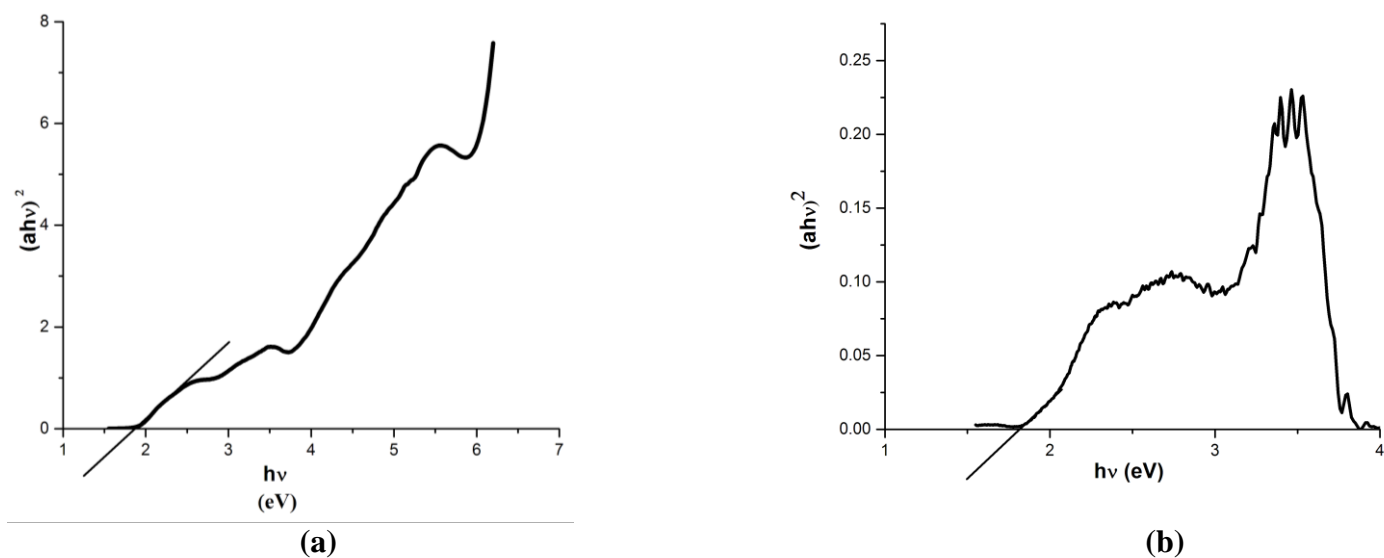

**Figure S12: Band Gap calculation of (a) 1 and (b) 2 using Tauc's Plot as per reference <sup>1, 2</sup>**

1. Dongol, M.; El-Nahass, M. M; El-Denglawey, A; Elhady, A. F; Abuelwafa, A. A. Optical Properties of Nano 5,10,15,20-Tetraphenyl-21H,23H-Prophyrin Nickel (II) Thin Films, *Curr. Appl. Phys.* **2012**, 12, 1178 and the references therein.
2. Kim, H-S; Lee, C-R; Im, J-H; Lee, K-B; Moehl, T; Marchioro, A; Moon, S-J; Humphry-Baker, R.; Yum, J-H; Moser, J. E; Gratzel, M; Park, N-G. Lead Iodide Perovskite Sensitized All-Solid-State Submicron Thin Film Mesoscopic Solar Cell with Efficiency Exceeding 9%, *Sci Rep.* **2012**, 2, 2-7.

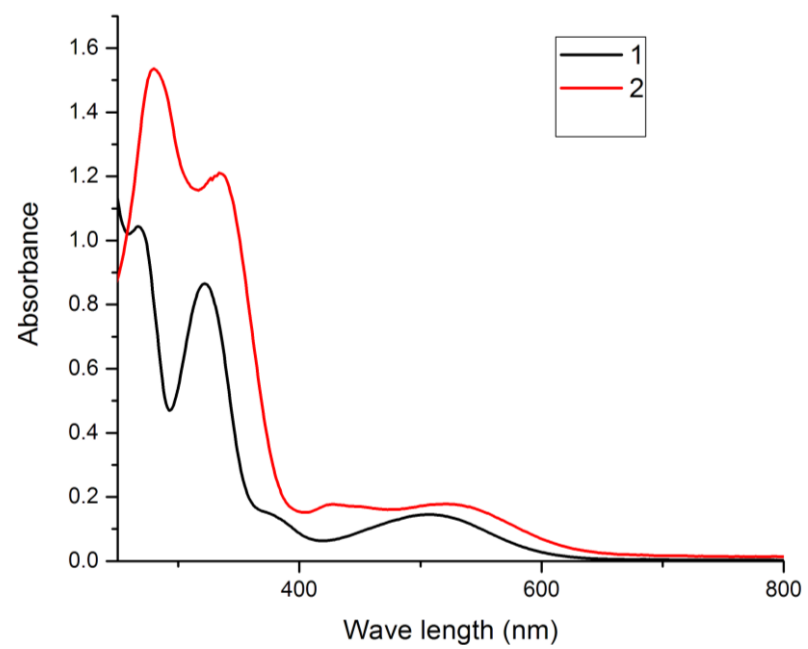

**Figure S13: UV –Visible Spectra of compounds 1 and 2 in  $2 \times 10^{-5}$  [M] dichloromethane solution**

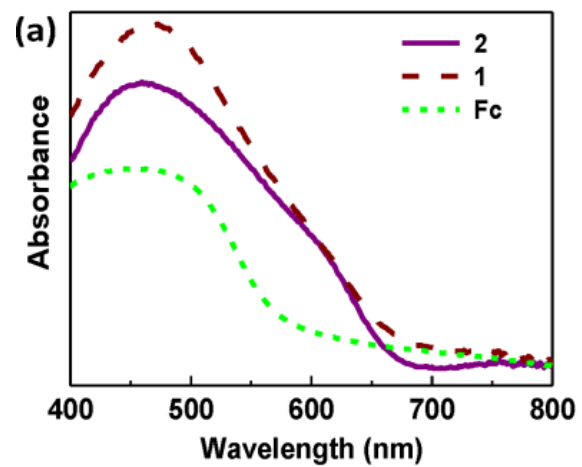

Figure S14: Thin film absorption spectra of 1, 2 and ferrocene (Fc).

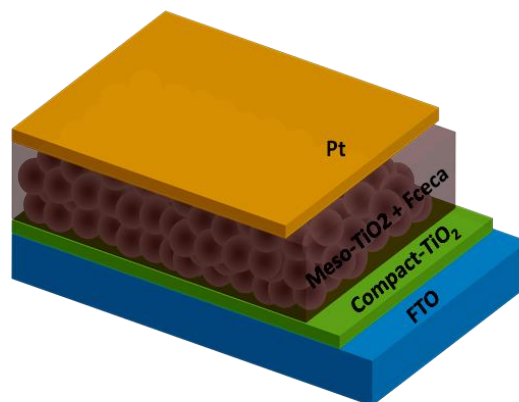

Figure S15: Schematic of the TiO<sub>2</sub>/[1],[2]/Pt meso-heterojunction solar cells.

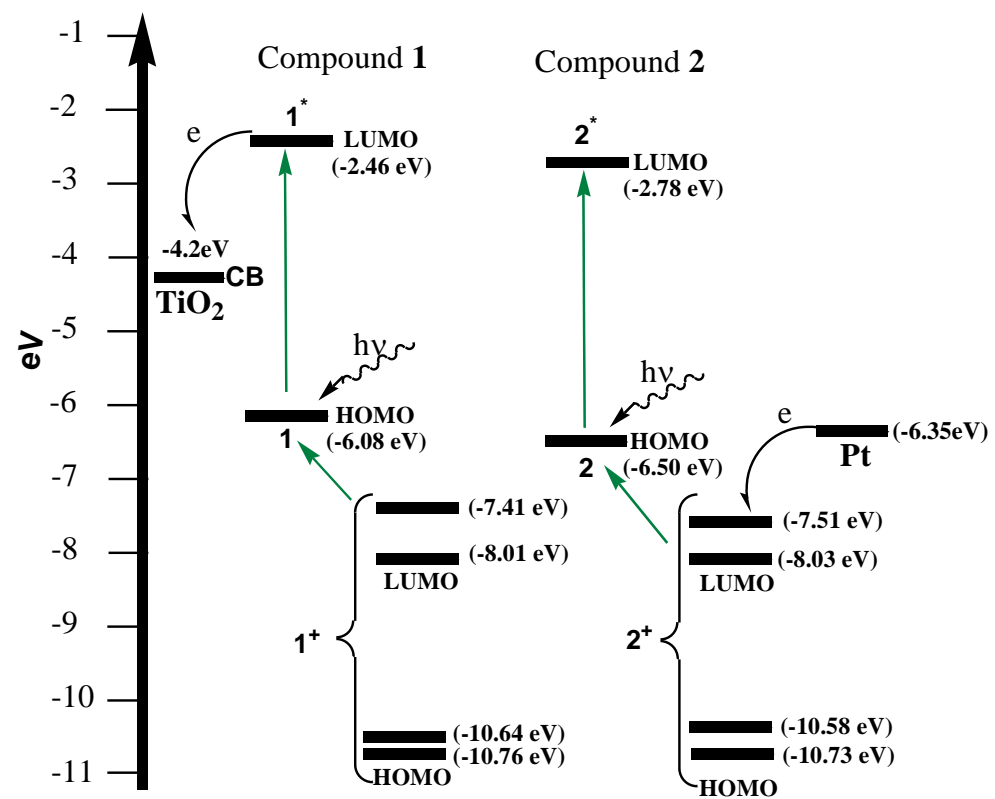

Figure S16: Proposed electron transfer processes

Table S5 : Frontier Molecular orbitals of 1, 1<sup>+</sup>, 2 and 2<sup>+</sup>.

|      | [1]                                                                                               | [1 <sup>+</sup> ]                                                                                    |                                                                                                      |
|------|---------------------------------------------------------------------------------------------------|------------------------------------------------------------------------------------------------------|------------------------------------------------------------------------------------------------------|
|      |                                                                                                   | $\alpha$                                                                                             | $\beta$                                                                                              |
| LUMO | 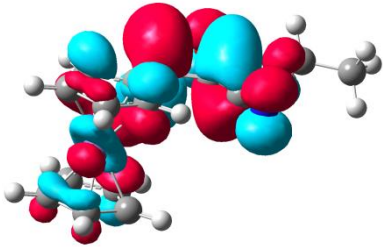 <p>-2.46 eV</p> |  <p>-7.41 eV</p>  |  <p>-8.01 eV</p>  |
| HOMO |  <p>-6.08 eV</p> |  <p>-10.64 eV</p> |  <p>-10.76 eV</p> |
|      | [2]                                                                                               | [2 <sup>+</sup> ]                                                                                    |                                                                                                      |
|      |                                                                                                   | $\alpha$                                                                                             | $\beta$                                                                                              |
| LUMO |                |                 |                 |



|      |                                                                                   |                                                                                     |                                                                                     |
|------|-----------------------------------------------------------------------------------|-------------------------------------------------------------------------------------|-------------------------------------------------------------------------------------|
|      | -2.78 eV                                                                          | -7.51 eV                                                                            | -8.03 eV                                                                            |
| HOMO | 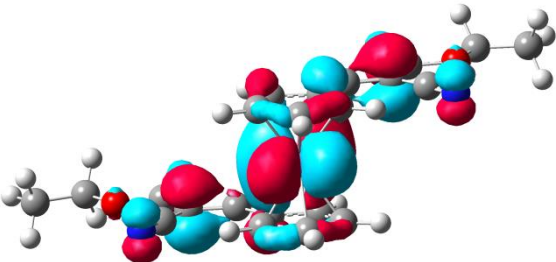 |  |  |
|      | -6.50 eV                                                                          | -10.58 eV                                                                           | -10.73 eV                                                                           |

**Table S6: Geometry optimized coordinates for compound 1**

Standard orientation:

| Center<br>Number | Atomic<br>Number | Atomic<br>Type | Coordinates (Angstroms) |   |   |
|------------------|------------------|----------------|-------------------------|---|---|
|                  |                  |                | X                       | Y | Z |

|    |    |   |           |           |           |
|----|----|---|-----------|-----------|-----------|
| 1  | 26 | 0 | -2.240218 | -0.060647 | -0.014777 |
| 2  | 8  | 0 | 4.080541  | -0.097981 | 0.111402  |
| 3  | 8  | 0 | 3.094794  | -0.472998 | -1.943970 |
| 4  | 6  | 0 | -0.625541 | 1.170077  | -0.610051 |
| 5  | 6  | 0 | -3.500774 | -1.208861 | 1.240579  |
| 6  | 1  | 0 | -4.178692 | -0.800030 | 1.976806  |
| 7  | 6  | 0 | -2.625366 | -2.003863 | -0.773143 |
| 8  | 6  | 0 | -2.540898 | 2.002142  | 0.442593  |
| 9  | 1  | 0 | -3.213610 | 2.389869  | 1.194413  |
| 10 | 6  | 0 | 1.866033  | 0.960314  | 1.216990  |
| 11 | 6  | 0 | -3.811907 | -1.476298 | -0.142670 |
| 12 | 1  | 0 | -4.764027 | -1.302131 | -0.624248 |
| 13 | 6  | 0 | 1.809659  | 0.542237  | -0.152593 |
| 14 | 7  | 0 | 1.882542  | 1.305813  | 2.348856  |
| 15 | 6  | 0 | -1.170803 | 1.639615  | 0.657975  |
| 16 | 1  | 0 | -0.636445 | 1.715897  | 1.592054  |
| 17 | 6  | 0 | -1.583785 | -2.065687 | 0.223841  |
| 18 | 1  | 0 | -0.568054 | -2.398316 | 0.060529  |
| 19 | 6  | 0 | 0.682070  | 0.647035  | -0.931814 |
| 20 | 1  | 0 | 0.806423  | 0.282561  | -1.952643 |
| 21 | 6  | 0 | -1.704549 | 1.235744  | -1.590205 |
| 22 | 1  | 0 | -1.616197 | 0.958595  | -2.631915 |
| 23 | 6  | 0 | 5.361198  | -0.674619 | -0.376692 |
| 24 | 1  | 0 | 5.698344  | -0.080434 | -1.234000 |
| 25 | 1  | 0 | 5.166798  | -1.697347 | -0.720171 |
| 26 | 6  | 0 | 6.337973  | -0.623903 | 0.791520  |
| 27 | 1  | 0 | 6.491815  | 0.407965  | 1.125289  |
| 28 | 1  | 0 | 7.306174  | -1.039665 | 0.483494  |
| 29 | 1  | 0 | 5.961634  | -1.207286 | 1.638866  |
| 30 | 6  | 0 | -2.871454 | 1.754864  | -0.942478 |
| 31 | 1  | 0 | -3.832056 | 1.928010  | -1.406095 |
| 32 | 6  | 0 | -2.121734 | -1.571909 | 1.467169  |
| 33 | 1  | 0 | -1.585185 | -1.484888 | 2.401418  |
| 34 | 6  | 0 | 3.026772  | -0.054543 | -0.769890 |
| 35 | 1  | 0 | -2.533108 | -2.302892 | -1.807839 |

**Table S7: Geometry optimized coordinates for compound 2**

Standard orientation:

| Center<br>Number | Atomic<br>Number | Atomic<br>Type | Coordinates (Angstroms) |           |           |
|------------------|------------------|----------------|-------------------------|-----------|-----------|
|                  |                  |                | X                       | Y         | Z         |
| 1                | 26               | 0              | 0.000162                | -1.787189 | -0.000058 |
| 2                | 8                | 0              | 5.272119                | 1.757680  | -0.104687 |
| 3                | 8                | 0              | -5.272124               | 1.757531  | 0.105171  |
| 4                | 8                | 0              | -3.343116               | 2.844972  | -0.554734 |
| 5                | 8                | 0              | 3.342978                | 2.844910  | 0.555179  |
| 6                | 6                | 0              | 1.368661                | -0.873194 | 1.340170  |
| 7                | 6                | 0              | -0.566940               | -3.052881 | -1.615674 |
| 8                | 1                | 0              | -0.502581               | -4.131728 | -1.612926 |
| 9                | 6                | 0              | -1.368538               | -0.872961 | -1.339977 |
| 10               | 6                | 0              | 0.567011                | -3.053161 | 1.615445  |
| 11               | 1                | 0              | 0.502683                | -4.132010 | 1.612579  |
| 12               | 6                | 0              | 4.256020                | -0.708110 | 0.249462  |
| 13               | 6                | 0              | -1.692091               | -2.284108 | -1.170664 |
| 14               | 1                | 0              | -2.618005               | -2.684477 | -0.788341 |
| 15               | 6                | 0              | 3.427282                | 0.419814  | 0.558614  |
| 16               | 7                | 0              | 4.912711                | -1.658005 | -0.008928 |
| 17               | 6                | 0              | 1.692224                | -2.284338 | 1.170695  |
| 18               | 1                | 0              | 2.618210                | -2.684618 | 0.788460  |
| 19               | 6                | 0              | -0.014901               | -0.808455 | -1.875972 |
| 20               | 1                | 0              | 0.520053                | 0.102751  | -2.108584 |
| 21               | 6                | 0              | 2.142779                | 0.309404  | 1.030871  |
| 22               | 1                | 0              | 1.644524                | 1.263308  | 1.210452  |
| 23               | 6                | 0              | 0.014955                | -0.808773 | 1.875996  |
| 24               | 1                | 0              | -0.520062               | 0.102385  | 2.108653  |
| 25               | 6                | 0              | 5.950550                | 3.059903  | -0.347563 |
| 26               | 1                | 0              | 5.941211                | 3.628203  | 0.589673  |
| 27               | 1                | 0              | 5.368579                | 3.613187  | -1.093736 |
| 28               | 6                | 0              | 7.360995                | 2.737204  | -0.824092 |
| 29               | 1                | 0              | 7.905814                | 2.163345  | -0.066698 |
| 30               | 1                | 0              | 7.908409                | 3.668956  | -1.016817 |

|    |   |   |           |           |           |
|----|---|---|-----------|-----------|-----------|
| 31 | 1 | 0 | 7.335532  | 2.150554  | -1.748806 |
| 32 | 6 | 0 | -0.470683 | -2.144970 | 2.048437  |
| 33 | 1 | 0 | -1.441345 | -2.424646 | 2.431845  |
| 34 | 6 | 0 | -5.950672 | 3.059675  | 0.348095  |
| 35 | 1 | 0 | -5.940184 | 3.628627  | -0.588729 |
| 36 | 1 | 0 | -5.369484 | 3.612370  | 1.095324  |
| 37 | 6 | 0 | 0.470702  | -2.144632 | -2.048681 |
| 38 | 1 | 0 | 1.441302  | -2.424268 | -2.432279 |
| 39 | 6 | 0 | -7.361693 | 2.736848  | 0.822844  |
| 40 | 1 | 0 | -7.905799 | 2.163697  | 0.064402  |
| 41 | 1 | 0 | -7.909144 | 3.668543  | 1.015734  |
| 42 | 1 | 0 | -7.337327 | 2.149447  | 1.747112  |
| 43 | 6 | 0 | 3.976556  | 1.790884  | 0.347683  |
| 44 | 6 | 0 | -3.976590 | 1.790881  | -0.347308 |
| 45 | 6 | 0 | -2.142683 | 0.309582  | -1.030545 |
| 46 | 6 | 0 | -3.427239 | 0.419864  | -0.558417 |
| 47 | 6 | 0 | -4.255973 | -0.708150 | -0.249574 |
| 48 | 7 | 0 | -4.912630 | -1.658132 | 0.008584  |
| 49 | 1 | 0 | -1.644422 | 1.263535  | -1.209894 |

-----

## Text S1: Experimental Sections

### 1.1. General Procedures

All reactions and manipulations were carried out under an inert atmosphere of dry, pre-purified argon using standard Schlenk line techniques. Solvents were purified, dried and distilled under argon atmosphere prior to use. Infrared spectra were recorded on a Perkin Elmer Spectrum 2 spectrometer as  $\text{CH}_2\text{Cl}_2$  solution and NMR spectra on a 400 MHz Bruker spectrometer in  $\text{CDCl}_3$  solvent. Elemental analyses were performed on a Vario El Cube analyser. Mass spectra were obtained on a SQ-300 MS instrument operating in ESI mode. UV-Visible spectroscopy was measured using Shimadzu UV2450. Cyclic voltammetric and differential pulse voltammetric measurements were carried out using a CH Instruments model 600D electrochemistry system. A platinum working electrode, a platinum wire auxiliary electrode and a standard calomel reference electrode were used in a three-electrode configuration. The supporting electrolyte used was 0.1 M  $[\text{NBu}_4]\text{ClO}_4$  and the solute concentration was  $\sim 10^{-3}$  M. The electrochemical experiments were scanned in the positive potential from 0 to +1.2 V and the scan rate used was  $50 \text{ mV s}^{-1}$ . All the electrochemical experiments were carried out under a nitrogen atmosphere and are uncorrected for junction potentials. The surface morphology of the deposited FTO/ $\text{TiO}_2$  thin film was examined using field emission scanning electron microscope (FE-SEM) Nova NanoSEM 450, FEI.  $[(\eta^5\text{-C}_5\text{H}_5)\text{Fe}(\eta^5\text{-C}_5\text{H}_4\text{CHO})]$ ,  $[\text{Fe}(\eta^5\text{-C}_5\text{H}_4)_2(\text{CHO})_2]$  were prepared following reported procedures.<sup>1</sup>

1.2. Synthesis of 1- $[(\eta^5\text{-C}_5\text{H}_5)\text{Fe}(\eta^5\text{-C}_5\text{H}_4)\text{CH}=\text{C}(\text{CN})\text{COR}]$ ,  $\{R = \text{OEt (1)}, -\text{NHN}=\text{C}(\text{CH}_3)\text{C}_6\text{H}_5 \text{ (4)}\}$  and 1,1'- $[\text{Fe}\{(\eta^5\text{-C}_5\text{H}_4)\text{CH}=\text{C}(\text{CN})\text{COR}\}_2]$ ,  $\{R = \text{OEt (2)}, -\text{NHN}=\text{C}(\text{CH}_3)\text{C}_6\text{H}_5 \text{ (5)}\}$

In a typical reaction procedure, 100 ml round bottomed flask containing 2 gm of Red mud (RM), solution of ferrocenyl carboxyldehyde (0.5 mmol, 107 mg) or 1,1'-ferrocenyl dicarboxyldehyde (0.5 mmol, 121 mg) was added. The mixture was thoroughly mixed using a magnetic stirrer and the solvent was evacuated using vacuum to obtain a solid mixture. Ethylcyanoacetate (0.5 mmol/1 mmol, 57 mg/ 113 mg) or  $[(\text{C}_6\text{H}_5)\text{C}(\text{CH}_3)=\text{NNHC}(\text{O})\text{CH}_2\text{CN}]$  (**3**) (0.5 mmol/1 mmol, 101 mg/ 201 mg) was then added to the solid reaction mixture and stirred continuously for one hour at room temperature condition. After the reaction, the solid reaction mixture was extracted in ethyl acetate and the solution was dried in vacuum. The residue was then dissolved in dichloromethane and subjected to short column chromatography to purify the compounds. Elution with 20% ethylacetate : n-hexane solvent mixture afforded the respective violet colored compounds, 1- $[(\eta^5\text{-C}_5\text{H}_5)\text{Fe}(\eta^5\text{-C}_5\text{H}_4)\text{CH}=\text{C}(\text{CN})\text{COR}]$ , {R = OEt (**1**), -NHN=C(CH<sub>3</sub>)C<sub>6</sub>H<sub>5</sub> (**4**)} or 1,1'- $[\text{Fe}\{(\eta^5\text{-C}_5\text{H}_4)\text{CH}=\text{C}(\text{CN})\text{COR}\}_2]$ , {R = OEt (**2**), -NHN=C(CH<sub>3</sub>)C<sub>6</sub>H<sub>5</sub> (**5**)} in high yields. (Yields: **1**: 151 mg (98 %); **2**: 207 mg (96 %); **4**: 158 mg (80 %); **5**: 232 mg (76 %))

**1**: Anal. Calcd. (C<sub>16</sub>NO<sub>2</sub>FeH<sub>15</sub>): C, 62.16; H, 4.89; N, 4.53, Found: C, 62.34; H, 4.82; N, 4.61. IR ( $\nu_{\text{CO}}$ , cm<sup>-1</sup>, CH<sub>2</sub>Cl<sub>2</sub>): 2222 (s), 1749(s), 1721(vs), 1715 (vs), 1591 (s). <sup>1</sup>H NMR ( $\delta$ , 400 MHz, CDCl<sub>3</sub>): 1.40 (t, -CH<sub>3</sub>, 3H, J=7.2 Hz), 4.28 (s,  $\eta^5\text{-C}_5\text{H}_5$ , 5H), 4.75 (t,  $\eta^5\text{-C}_5\text{H}_4$ , 2H, J=2 Hz), 5.05 (t,  $\eta^5\text{-C}_5\text{H}_4$ , 2H, J=2 Hz), 4.34 (q, CH<sub>2</sub>, 2H, J=7.2 Hz), 8.21 (s, =CH, 1H). <sup>13</sup>C NMR ( $\delta$ , 101 MHz, CDCl<sub>3</sub>): 14.24 (-CH<sub>3</sub>), 62.12 (-CH<sub>2</sub>CH<sub>3</sub>), 70.61 ( $\eta^5\text{-C}_5\text{H}_5$ ), 71.82 ( $\eta^5\text{-C}_5\text{H}_4$ ), 74.14 ( $\eta^5\text{-C}_5\text{H}_4$ ), 97.13 (-C=C), 116.95 (-C=C-), 158.76 (-CN), 163.29 (-C=O). MS (ESI) m/z : Calculated (C<sub>16</sub>NO<sub>2</sub>FeH<sub>15</sub>) 309.14; Found: 310.10 (M+H). UV-Vis  $\lambda_{\text{max}}$  (nm,  $\epsilon$  (Mol<sup>-1</sup> cm<sup>-1</sup>): 267 (52000), 320 (43500), 380 (7200), 510 (7500).

**2**: Anal. Calcd. (C<sub>22</sub>N<sub>2</sub>O<sub>4</sub>FeH<sub>20</sub>): C, 61.13; H, 4.66; N, 6.48, Found: C, 61.38; H, 4.54; N, 6.59. IR ( $\nu_{\text{CO}}$ , cm<sup>-1</sup>, CH<sub>2</sub>Cl<sub>2</sub>): 2223(m), 1723(vs), 1600 (vs). <sup>1</sup>H NMR ( $\delta$ , 400 MHz, CDCl<sub>3</sub>): 1.41 (t, CH<sub>3</sub>, 3H, J= 7.2 Hz ), 4.75 (t,  $\eta^5\text{-C}_5\text{H}_4$ , 4H, J = 2Hz ), 4.36 (q, -CH<sub>2</sub>, 4H, J= 7.2 Hz ), 5.13 (t,  $\eta^5\text{-C}_5\text{H}_4$ , 4H, J = 2 Hz), 8.04 (s, =CH, 2H). <sup>13</sup>C NMR ( $\delta$ , 101 MHz, CDCl<sub>3</sub>): 14.16 (-CH<sub>3</sub>), 62.46 (-CH<sub>2</sub>CH<sub>3</sub>), 73.35 ( $\eta^5\text{-C}_5\text{H}_4$ ), 75.30 ( $\eta^5\text{-C}_5\text{H}_4$ ), 76.02 ( $\eta^5\text{-C}_5\text{H}_4$ ), 100.54 (-C=C),

116.15 (-C=C-), 155.72 (-CN), 162.43 (C=O). MS (ESI) m/z : Calculated (C<sub>22</sub>N<sub>2</sub>O<sub>4</sub>FeH<sub>20</sub>) 432.25; Found: 433.03 (M+H). UV-Vis  $\lambda_{\text{max}}$  (nm,  $\epsilon$  (Mol<sup>-1</sup> cm<sup>-1</sup>): 280 (77000), 335 (60500), 425 (8700), 521 (9000).

**4:** Anal. Calcd. (C<sub>22</sub>N<sub>3</sub>OFeH<sub>19</sub>): C, 66.52; H, 4.82; N, 10.58, Found: C, 66.75; H, 4.89; N, 10.70. IR( $\nu_{\text{CO}}$ , cm<sup>-1</sup>, CH<sub>2</sub>Cl<sub>2</sub>): 2211 (m), 1730(vs), 1712(s), 1669(s), 1585(s). <sup>1</sup>H NMR ( $\delta$ , 400 MHz, CDCl<sub>3</sub>): 2.38 (s, CH<sub>3</sub>, 3H), 4.30 (s,  $\eta^5$ -C<sub>5</sub>H<sub>4</sub>, 5H), 4.78(s,  $\eta^5$ -C<sub>5</sub>H<sub>4</sub>, 2H), 5.05(s,  $\eta^5$ -C<sub>5</sub>H<sub>4</sub>, 2H), 7.43 – 7.82 (m, C<sub>6</sub>H<sub>5</sub>, 5H), 8.46 (s, =CH, 1H), 9.15 (s, NH, 1H). MS (ESI) m/z: Calculated (C<sub>22</sub>N<sub>3</sub>OFeH<sub>19</sub>) 397.25; Found: 399.26 (M+2H), 398.17 (M+H).

**5:** Anal. Calcd. (C<sub>34</sub>N<sub>6</sub>O<sub>2</sub>FeH<sub>28</sub>): C, 67.11; H, 4.64; N, 13.81, Found: C, 67.26; H, 4.55; N, 13.86. IR ( $\nu_{\text{CO}}$ , cm<sup>-1</sup>, CH<sub>2</sub>Cl<sub>2</sub>): 2213 (m), 1693(s), 1673(s), 1667(vs), 1650(s). <sup>1</sup>H NMR ( $\delta$ , 400 MHz, CDCl<sub>3</sub>): 4.74 (s,  $\eta^5$ -C<sub>5</sub>H<sub>4</sub>, 4H), 5.15(s,  $\eta^5$ -C<sub>5</sub>H<sub>4</sub>, 4H), 7.30 – 7.68 (m, C<sub>6</sub>H<sub>5</sub>, 5H), 8.21(s, =CH, 2H), 9.26 (s, NH, 2H). MS (ESI) m/z : Calculated (C<sub>34</sub>N<sub>6</sub>O<sub>2</sub>FeH<sub>28</sub>) 608.47; Found: 609.16 (M+H).

### 1.3. Synthesis of [(C<sub>6</sub>H<sub>5</sub>)C(CH<sub>3</sub>)=NNHC(O)CH<sub>2</sub>CN] (3)

In a 100 ml round bottomed flask or conical flask containing 1 gm of Rice Husk ash (RHA), dichloromethane solution of cyanoacetyl hydrazide (0.12 mmol) was added and the mixture was thoroughly mixed using magnetic stirrer. Solvent was evaporated to dryness using vacuum to obtain a solid mixture. Acetophenone (0.1mmol) was then added and stirred continuously for five hours at 40° C. After the reaction, the solid mixture was cooled and extracted in dichloromethane solvent and dried in vacuum. The residue was then dissolved in dichloromethane and subjected to chromatographic work

up using a short column chromatography. Rapid elution with 20% ethylacetate : n-hexane solvent mixture afforded the compound  $[(\text{C}_6\text{H}_5)\text{C}(\text{CH}_3)=\text{NNHC}(\text{O})\text{CH}_2\text{CN}]$  (**3**).

**3:** IR ( $\nu_{\text{CO}}$ ,  $\text{cm}^{-1}$ ,  $\text{CH}_2\text{Cl}_2$ ): 2222 (m), 1693 (vs), 1640 (s), 1632 (m).  $^1\text{H}$  NMR ( $\delta$ , 400 MHz,  $\text{CDCl}_3$ ): 2.29 (s,  $\text{CH}_3$ , 3H), 3.93(s,  $\text{CH}_2$ , 2H), 7.42 – 7.73(m, 5H), 9.23 (s, NH, 1H).

*Spectral data matched with those previously reported.*<sup>2</sup>

#### 1.4. Crystal structure determination for **2**

Single crystal X-ray structural studies of **2** were performed on a CCD Oxford Diffraction XCALIBUR-S diffractometer equipped with an Oxford Instruments low-temperature attachment. Data were collected at 150(2) K using graphite-monochromated Mo  $\text{K}\alpha$  radiation ( $\lambda_\alpha = 0.71073 \text{ \AA}$ ). The strategy for the data collection was evaluated by using the CrysAlisPro CCD software. The data were collected by the standard 'phi-omega scan' techniques, and were scaled and reduced using CrysAlisPro RED software. The structures were solved by direct methods using SHELXS-97 and refined by full matrix least-squares with SHELXL-97, refining on  $F^2$ .<sup>3</sup> The positions of all the atoms were obtained by direct methods. All non-hydrogen atoms were refined anisotropically. The remaining hydrogen atoms were placed in geometrically constrained positions and refined with isotropic temperature factors, generally  $1.2U_{eq}$  of their parent atoms.

#### 1.5. Solar cell fabrication



Fluorine-doped tin oxide (FTO) coated glass (Sigma Aldrich TEC A7) was cleaned by detergent, DI water, acetone, and ethanol using ultrasonic cleaner, and then dried. Cleaned FTO coated glass substrates underwent UV-ozone treatment for 30 min prior to the deposition of compact TiO<sub>2</sub> hole-blocking layer. A mildly acidic solution of Titanium isopropoxide in ethanol was spin coated on substrates for 45 seconds at 2000 rpm to deposit the compact TiO<sub>2</sub> layer. Then the coated film was dried at 150°C for 20 minutes followed by annealing at 450°C for 30 minutes. Commercially available TiO<sub>2</sub> paste (Dysole 18NR-T) was diluted in ethanol and spin coated at 1500 rpm for 60 s to get the meso-TiO<sub>2</sub> electron transporting layer of thickness about 2  $\mu$ m. The deposited film was dried at 200°C for 15 min and finally annealed at 550°C for 45 min. Meso-TiO<sub>2</sub> coated FTO photo-anode was also treated with UV-ozone treatment before compound loading. The TiO<sub>2</sub> layer was sensitized by immersing the meso-TiO<sub>2</sub> coated substrate into a 0.01M dichloromethane solution of **1** or **2** for 12 hours followed by drying the sample under vacuum for another 12 hours. Finally, circular Pt electrodes (80 nm thick) of diameter 1 mm were deposited by thermal evaporation through a shadow mask on the sample to complete the device fabrication.

#### *1.6. J-V measurement:*

The current density vs voltage (*J-V*) characteristics was measured using Keithley 2400 source meter with the LabTracer 2.0 software under the illumination of 100 mW/cm<sup>2</sup> (AM 1.5G) from a solar simulator (Class AAA solar simulator, Model 94063A, Oriel) and a calibrated Si-reference cell certificated by NREL. Diode characteristics in dark condition as well as under illumination condition was measured using the same fabricated device.

#### *1.7. Computational details*

DFT calculations was carried out using Gaussian 09 (Version: ES64L-G09RevE.01) with LANL2DZ basis set at B3LYP level of theory. Geometry optimization of compounds **1** and **2** and their oxidized species (**1**<sup>+</sup>, **2**<sup>+</sup>) was carried out in gas phase by density functional theory (DFT) at B3LYP level using LANL2DZ basis sets. The Natural electron population analysis (NPA) was also performed on **1** and **2** as well as on their respective 1e<sup>-</sup>-oxidized species using the same basis set. The spectroscopic and electronic property of these complexes has been computed by time dependent DFT (TD-DFT) calculation at the same B3LYP level in gaseous phase.<sup>4</sup> Frequency calculation has been done at the same level of theory and found that the number of imaginary frequency is zero.

#### 1.8. References:

1. Mueller-Westerhoff, U. T.; Yang, Z.; Ingram, G. A simple synthesis of metallocene aldehydes from lithiometallocenes and N,N-dimethylformamide: Ferrocene and ruthenocene aldehydes and 1,1'-dialdehydes. *J. Organomet. Chem.* **1993**, *463*, 163-167.
2. (a) Zelenin, K. N.; Oleinik, S. V.; Alekseev, V. V.; Potekhin, A. A. Structure of cyanoacetylhydrazones of aldehydes and ketones. *Russ. J. General Chem.* **2001**, *71*, 1116-1120.
3. Sheldrick, G. M. A short history of SHELX, *Acta Cryst. A* **2008**, *64*, 112-122.
4. (a) Becke, A. D.; *J. Chem. Phys.* **1993**, *98*, 5648. (b) Lee, A.; Yang, W.; Parr, R. G. *Phys. Rev. B* **1988**, *37*, 785. (c) Ghosh, A.; Halvorsen, I.; Nilsen, H. J.; Steene, E.; Wondimagegn, T.; Lie, R.; Caemelbecke, E.; Guo, N.; Ou, Z.; Kadish, K. M. *Phys. Chem. B* **2001**, *105*, 8120.
